# Supplementary material for: LiFePO4 nanoparticles growth with preferential (010) face modulated by Tween-80
Source: Royal Society of Chemistry journal article supplement (doi:10.1039/c4ra14791j), 2015-01-01
Supplement: c4ra14791j1.pdf [file c4ra14791j1.pdf]

## Supporting Information

### LiFePO<sub>4</sub> nanoparticles growth with preferential (010) face modulated by Tween-80

Yuanyuan Liu<sup>a</sup>, Junjie Gu<sup>a,b</sup>, Jinli Zhang<sup>a</sup>, Feng Yu<sup>c</sup>, Jiao Wang<sup>a</sup>, Ning Nie<sup>a</sup> and Wei Li<sup>\*a</sup>

<sup>a</sup> School of Chemical Engineering and Technology, Tianjin University, Tianjin 300072, P. R

.China

<sup>b</sup> Department of Mechanical and Aerospace Engineering, Carleton University, Ottawa, K1S 5B6,

Canada

<sup>c</sup> Key Laboratory for Green Processing of Chemical Engineering of Xinjiang Bingtuan, School of

Chemistry and Chemical Engineering, Shihezi University, Shihezi 832003, P.R. China

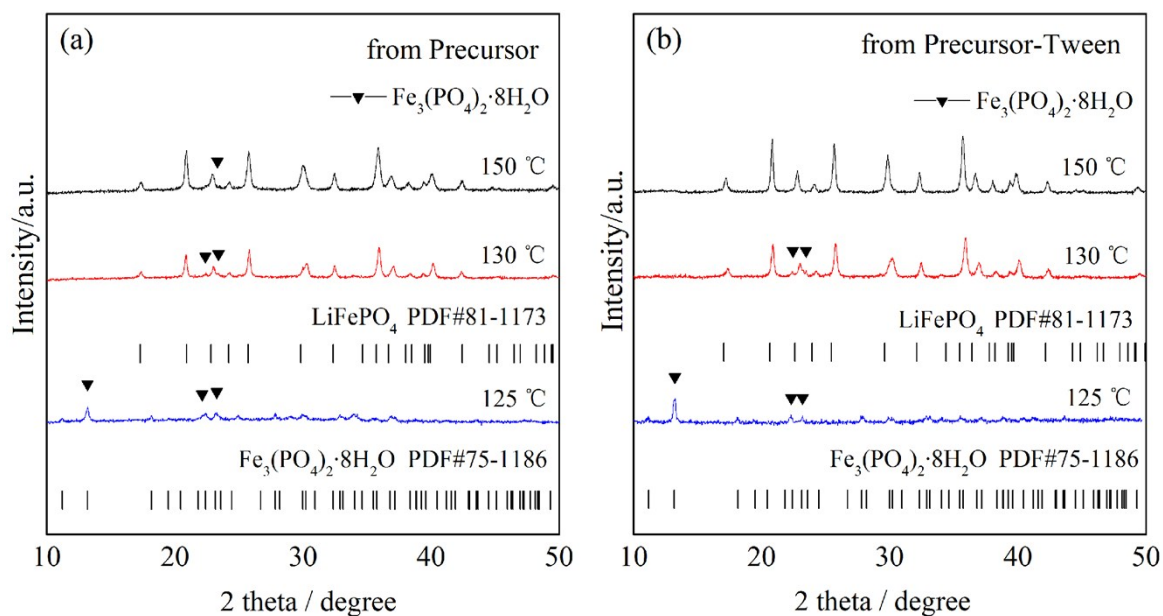

**Fig. S1** XRD patterns of the particles synthesized using the precursors of Precursor and Precursor-Tween during the temperature-rising period with the terminal hydrothermal temperatures of 125 °C, 130 °C and 150 °C, respectively.
